# Supplementary material for: Who are more vulnerable to FoMO? Predictors and moderators of FoMO among Dutch adolescents
Source: Research Square preprint supplement (doi:10.21203/rs.3.rs-7790755/v1), 2025-11-21
Supplement: Supplementary file 1 [file 4ea9206eac51590851cf06f2.docx]

**Appendix 2**

**Table B1**

*Interaction Effect of Problematic Social Media Use and Life Satisfaction*

| **Predictor** | **Full sample (*n* = 1419)** | | | |  | **Complete sample (*n* = 1369)** | | | |
| --- | --- | --- | --- | --- | --- | --- | --- | --- | --- |
|  | ***b*** | ***SE*** | ***p*** | ***β*** |  | ***b*** | ***SE*** | ***p*** | ***β*** |
| Gender | 0.13 | 0.04 | .001 | 0.09 |  | 0.13 | 0.04 | .001 | 0.09 |
| Age | 0.02 | 0.02 | .252 | 0.03 |  | 0.02 | 0.02 | .252 | 0.03 |
| Educational level | 0.09 | 0.03 | .001 | 0.08 |  | 0.09 | 0.03 | .001 | 0.08 |
| FoMO T1 | 0.41 | 0.03 | **< .001** | 0.40 |  | 0.41 | 0.03 | **< .001** | 0.39 |
| Life satisfaction | -0.06 | 0.03 | .028 | -0.07 |  | -0.05 | 0.03 | .031 | -0.07 |
| Depression | 0.06 | 0.03 | .053 | 0.06 |  | 0.06 | 0.03 | .053 | 0.06 |
| Perceived social competence | -0.07 | 0.03 | .016 | -0.06 |  | -0.07 | 0.03 | .016 | -0.06 |
| Intensity of meeting friends offline | 0.03 | 0.02 | .097 | 0.05 |  | 0.03 | 0.02 | .097 | 0.04 |
| Impulsivity | 0.04 | 0.03 | .292 | 0.04 |  | 0.04 | 0.03 | .291 | 0.04 |
| Attention deficit | -0.01 | 0.04 | .695 | -0.01 |  | -0.01 | 0.04 | .695 | -0.01 |
| Narcissism | 0.07 | 0.04 | .050 | 0.05 |  | 0.07 | 0.04 | .050 | 0.05 |
| Self-esteem | 0.05 | 0.03 | .135 | 0.05 |  | 0.05 | 0.03 | .135 | 0.05 |
| Problematic social media use | 0.02 | 0.02 | .496 | 0.02 |  | 0.01 | 0.02 | .523 | 0.02 |
| Problematic social media use*Life satisfaction | -0.02 | 0.02 | .234 | -0.03 |  | -0.02 | 0.02 | .234 | -0.03 |

Note. Significant coefficient is highlighted in bold, same as below.

**Table B2**

*Interaction Effect of Problematic Social Media Use and Depression*

| **Predictor** | **Full sample (*n* = 1419)** | | | |  | **Complete sample (*n* = 1369)** | | | |
| --- | --- | --- | --- | --- | --- | --- | --- | --- | --- |
|  | ***b*** | ***SE*** | ***p*** | ***β*** |  | ***b*** | ***SE*** | ***p*** | ***β*** |
| Gender | 0.13 | 0.04 | .001 | 0.09 |  | 0.13 | 0.04 | .001 | 0.09 |
| Age | 0.02 | 0.02 | .257 | 0.03 |  | 0.02 | 0.02 | .256 | 0.03 |
| Educational level | 0.09 | 0.03 | .001 | 0.08 |  | 0.09 | 0.03 | .001 | 0.09 |
| FoMO T1 | 0.41 | 0.03 | **< .001** | 0.40 |  | 0.41 | 0.03 | **< .001** | 0.39 |
| Life satisfaction | -0.06 | 0.03 | .024 | -0.08 |  | -0.06 | 0.03 | .024 | -0.07 |
| Depression | 0.05 | 0.02 | .061 | 0.06 |  | 0.04 | 0.02 | .066 | 0.06 |
| Perceived social competence | -0.07 | 0.03 | .017 | -0.06 |  | -0.07 | 0.03 | .017 | -0.06 |
| Intensity of meeting friends offline | 0.03 | 0.02 | .106 | 0.04 |  | 0.03 | 0.02 | .106 | 0.04 |
| Impulsivity | 0.04 | 0.03 | .282 | 0.04 |  | 0.04 | 0.03 | .282 | 0.04 |
| Attention deficit | -0.02 | 0.04 | .653 | -0.02 |  | -0.02 | 0.04 | .653 | -0.02 |
| Narcissism | 0.07 | 0.04 | .050 | 0.05 |  | 0.07 | 0.04 | .050 | 0.05 |
| Self-esteem | 0.05 | 0.03 | .147 | 0.05 |  | 0.05 | 0.03 | .147 | 0.05 |
| Problematic social media use | 0.02 | 0.02 | .386 | 0.02 |  | 0.02 | 0.02 | .400 | 0.02 |
| Problematic social media use*Depression | 0.02 | 0.02 | .361 | 0.02 |  | 0.02 | 0.02 | .361 | 0.02 |

**Table B3**

*Interaction Effect of Problematic Social Media Use and Perceived Social Competence*

| **Predictor** | **Full sample (*n* = 1419)** | | | |  | **Complete sample (*n* = 1369)** | | | |
| --- | --- | --- | --- | --- | --- | --- | --- | --- | --- |
|  | ***b*** | ***SE*** | ***p*** | ***β*** |  | ***b*** | ***SE*** | ***p*** | ***β*** |
| Gender | 0.13 | 0.04 | .001 | 0.09 |  | 0.13 | 0.04 | .001 | 0.09 |
| Age | 0.02 | 0.02 | .275 | 0.03 |  | 0.02 | 0.02 | .274 | 0.03 |
| Educational level | 0.09 | 0.03 | .001 | 0.08 |  | 0.09 | 0.03 | .001 | 0.09 |
| FoMO T1 | 0.41 | 0.03 | **< .001** | 0.39 |  | 0.41 | 0.03 | **< .001** | 0.39 |
| Life satisfaction | -0.07 | 0.03 | .020 | -0.08 |  | -0.07 | 0.03 | .020 | -0.08 |
| Depression | 0.06 | 0.03 | .059 | 0.06 |  | 0.06 | 0.03 | .059 | 0.06 |
| Perceived social competence | -0.05 | 0.02 | .015 | -0.07 |  | -0.05 | 0.02 | .013 | -0.07 |
| Intensity of meeting friends offline | 0.03 | 0.02 | .096 | 0.05 |  | 0.03 | 0.02 | .096 | 0.04 |
| Impulsivity | 0.03 | 0.03 | .315 | 0.04 |  | 0.03 | 0.03 | .315 | 0.03 |
| Attention deficit | -0.01 | 0.04 | .697 | -0.01 |  | -0.01 | 0.04 | .697 | -0.01 |
| Narcissism | 0.07 | 0.04 | .051 | 0.05 |  | 0.07 | 0.04 | .051 | 0.05 |
| Self-esteem | 0.05 | 0.03 | .123 | 0.05 |  | 0.05 | 0.03 | .123 | 0.05 |
| Problematic social media use | 0.03 | 0.02 | .173 | 0.04 |  | 0.03 | 0.02 | .173 | 0.04 |
| Problematic social media use*Perceived social competence | 0.02 | 0.02 | .186 | 0.03 |  | 0.02 | 0.02 | .186 | 0.03 |

**Table B4**

*Interaction Effect of Problematic Social Media Use and Intensity of Meeting Friends Offline*

| **Predictor** | **Full sample (*n* = 1419)** | | | |  | **Complete sample (*n* = 1369)** | | | |
| --- | --- | --- | --- | --- | --- | --- | --- | --- | --- |
|  | ***b*** | ***SE*** | ***p*** | ***β*** |  | ***b*** | ***SE*** | ***p*** | ***β*** |
| Gender | 0.13 | 0.04 | .001 | 0.09 |  | 0.13 | 0.04 | .001 | 0.09 |
| Age | 0.02 | 0.02 | .257 | 0.03 |  | 0.02 | 0.02 | .257 | 0.03 |
| Educational level | 0.09 | 0.03 | .001 | 0.08 |  | 0.09 | 0.03 | .001 | 0.08 |
| FoMO T1 | 0.41 | 0.03 | **< .001** | 0.40 |  | 0.41 | 0.03 | **< .001** | 0.39 |
| Life satisfaction | -0.06 | 0.03 | .021 | -0.08 |  | -0.06 | 0.03 | .021 | -0.08 |
| Depression | 0.06 | 0.03 | .056 | 0.06 |  | 0.06 | 0.03 | .056 | 0.06 |
| Perceived social competence | -0.07 | 0.03 | .017 | -0.06 |  | -0.07 | 0.03 | .017 | -0.06 |
| Intensity of meeting friends offline | 0.03 | 0.02 | .101 | 0.05 |  | 0.03 | 0.02 | .100 | 0.04 |
| Impulsivity | 0.04 | 0.03 | .285 | 0.04 |  | 0.04 | 0.03 | .284 | 0.04 |
| Attention deficit | -0.02 | 0.04 | .667 | -0.02 |  | -0.02 | 0.04 | .666 | -0.01 |
| Narcissism | 0.07 | 0.04 | .053 | 0.05 |  | 0.07 | 0.04 | .053 | 0.05 |
| Self-esteem | 0.05 | 0.03 | .125 | 0.05 |  | 0.05 | 0.03 | .125 | 0.05 |
| Problematic social media use | 0.02 | 0.02 | .273 | 0.03 |  | 0.02 | 0.02 | .268 | 0.03 |
| Problematic social media use*Intensity of meeting friends offline | 0.00 | 0.02 | .876 | 0.00 |  | 0.00 | 0.02 | .876 | 0.00 |

**Table B5**

*Interaction Effect of Problematic Social Media Use and Impulsivity*

| **Predictor** | **Full sample (*n* = 1419)** | | | |  | **Complete sample (*n* = 1369)** | | | |
| --- | --- | --- | --- | --- | --- | --- | --- | --- | --- |
|  | ***b*** | ***SE*** | ***p*** | ***β*** |  | ***b*** | ***SE*** | ***p*** | ***β*** |
| Gender | 0.14 | 0.04 | .001 | 0.09 |  | 0.14 | 0.04 | .001 | 0.09 |
| Age | 0.02 | 0.02 | .262 | 0.03 |  | 0.02 | 0.02 | .262 | 0.03 |
| Educational level | 0.09 | 0.03 | .001 | 0.08 |  | 0.09 | 0.03 | .001 | 0.08 |
| FoMO T1 | 0.41 | 0.03 | **< .001** | 0.40 |  | 0.41 | 0.03 | **< .001** | 0.39 |
| Life satisfaction | -0.07 | 0.03 | .020 | -0.08 |  | -0.07 | 0.03 | .020 | -0.08 |
| Depression | 0.06 | 0.03 | .063 | 0.06 |  | 0.06 | 0.03 | .063 | 0.06 |
| Perceived social competence | -0.07 | 0.03 | .016 | -0.07 |  | -0.07 | 0.03 | .016 | -0.06 |
| Intensity of meeting friends offline | 0.03 | 0.02 | .094 | 0.05 |  | 0.03 | 0.02 | .094 | 0.04 |
| Impulsivity | 0.04 | 0.03 | .298 | 0.04 |  | 0.04 | 0.03 | .299 | 0.04 |
| Attention deficit | -0.01 | 0.03 | .805 | -0.01 |  | -0.01 | 0.03 | .838 | -0.01 |
| Narcissism | 0.07 | 0.04 | .056 | 0.05 |  | 0.07 | 0.04 | .056 | 0.05 |
| Self-esteem | 0.06 | 0.03 | .100 | 0.06 |  | 0.06 | 0.03 | .100 | 0.05 |
| Problematic social media use | 0.03 | 0.02 | .140 | 0.04 |  | 0.03 | 0.02 | .121 | 0.04 |
| Problematic social media use*Impulsivity | -0.02 | 0.02 | .114 | -0.04 |  | -0.02 | 0.01 | .114 | -0.04 |

**Table B6**

*Interaction Effect of Problematic Social Media Use and Attention Deficit)*

| **Predictor** | **Full sample (*n* = 1419)** | | | |  | **Complete sample (*n* = 1369)** | | | |
| --- | --- | --- | --- | --- | --- | --- | --- | --- | --- |
|  | ***b*** | ***SE*** | ***p*** | ***β*** |  | ***b*** | ***SE*** | ***p*** | ***β*** |
| Gender | 0.14 | 0.04 | .001 | 0.09 |  | 0.14 | 0.04 | .001 | 0.09 |
| Age | 0.02 | 0.02 | .241 | 0.03 |  | 0.02 | 0.02 | .241 | 0.03 |
| Educational level | 0.09 | 0.03 | .001 | 0.08 |  | 0.09 | 0.03 | .001 | 0.09 |
| FoMO T1 | 0.41 | 0.03 | **< .001** | 0.40 |  | 0.41 | 0.03 | **< .001** | 0.39 |
| Life satisfaction | -0.07 | 0.03 | .018 | -0.08 |  | -0.07 | 0.03 | .018 | -0.08 |
| Depression | 0.06 | 0.03 | .061 | 0.06 |  | 0.06 | 0.03 | .061 | 0.06 |
| Perceived social competence | -0.07 | 0.03 | .020 | -0.06 |  | -0.07 | 0.03 | .020 | -0.06 |
| Intensity of meeting friends offline | 0.03 | 0.02 | .105 | 0.04 |  | 0.03 | 0.02 | .105 | 0.04 |
| Impulsivity | 0.03 | 0.03 | .271 | 0.04 |  | 0.03 | 0.03 | .254 | 0.04 |
| Attention deficit | -0.01 | 0.04 | .693 | -0.01 |  | -0.01 | 0.04 | .693 | -0.01 |
| Narcissism | 0.07 | 0.04 | .054 | 0.05 |  | 0.07 | 0.04 | .054 | 0.05 |
| Self-esteem | 0.05 | 0.03 | .111 | 0.05 |  | 0.05 | 0.03 | .111 | 0.05 |
| Problematic social media use | 0.03 | 0.02 | .130 | 0.04 |  | 0.03 | 0.02 | .122 | 0.04 |
| Problematic social media use*Attention deficit | -0.02 | 0.02 | .130 | -0.04 |  | -0.02 | 0.02 | .130 | -0.04 |

**Table B7**

*Interaction Effect of Problematic Social Media Use and Narcissism*

| **Predictor** | **Full sample (*n* = 1419)** | | | |  | **Complete sample (*n* = 1369)** | | | |
| --- | --- | --- | --- | --- | --- | --- | --- | --- | --- |
|  | ***b*** | ***SE*** | ***p*** | ***β*** |  | ***b*** | ***SE*** | ***p*** | ***β*** |
| Gender | 0.13 | 0.04 | .001 | 0.09 |  | 0.13 | 0.04 | .001 | 0.09 |
| Age | 0.02 | 0.02 | .251 | 0.03 |  | 0.02 | 0.02 | .251 | 0.03 |
| Educational level | 0.09 | 0.03 | .001 | 0.08 |  | 0.09 | 0.03 | .001 | 0.08 |
| FoMO T1 | 0.41 | 0.03 | **< .001** | 0.40 |  | 0.41 | 0.03 | **< .001** | 0.39 |
| Life satisfaction | -0.06 | 0.03 | .021 | -0.08 |  | -0.06 | 0.03 | .021 | -0.08 |
| Depression | 0.06 | 0.03 | .057 | 0.06 |  | 0.06 | 0.03 | .057 | 0.06 |
| Perceived social competence | -0.07 | 0.03 | .017 | -0.06 |  | -0.07 | 0.03 | .017 | -0.06 |
| Intensity of meeting friends offline | 0.03 | 0.02 | .102 | 0.05 |  | 0.03 | 0.02 | .102 | 0.04 |
| Impulsivity | 0.04 | 0.03 | .283 | 0.04 |  | 0.04 | 0.03 | .283 | 0.04 |
| Attention deficit | -0.02 | 0.04 | .671 | -0.02 |  | -0.02 | 0.04 | .671 | -0.01 |
| Narcissism | 0.04 | 0.02 | .052 | 0.05 |  | 0.04 | 0.02 | .051 | 0.05 |
| Self-esteem | 0.05 | 0.03 | .124 | 0.05 |  | 0.05 | 0.03 | .124 | 0.05 |
| Problematic social media use | 0.02 | 0.02 | .257 | 0.03 |  | 0.02 | 0.02 | .253 | 0.03 |
| Problematic social media use*Narcissism | -0.01 | 0.02 | .759 | -0.01 |  | -0.01 | 0.02 | .759 | -0.01 |

**Table B8**

*Interaction Effect of Problematic Social Media Use and Self-Esteem*

| **Predictor** | **Full sample (*n* = 1419)** | | | |  | **Complete sample (*n* = 1369)** | | | |
| --- | --- | --- | --- | --- | --- | --- | --- | --- | --- |
|  | ***b*** | ***SE*** | ***p*** | ***β*** |  | ***b*** | ***SE*** | ***p*** | ***β*** |
| Gender | 0.13 | 0.04 | .001 | 0.09 |  | 0.13 | 0.04 | .001 | 0.09 |
| Age | 0.02 | 0.02 | .270 | 0.03 |  | 0.02 | 0.02 | .270 | 0.03 |
| Educational level | 0.09 | 0.03 | .001 | 0.08 |  | 0.09 | 0.03 | .001 | 0.08 |
| FoMO T1 | 0.41 | 0.03 | **< .001** | 0.40 |  | 0.41 | 0.03 | **< .001** | 0.39 |
| Life satisfaction | -0.06 | 0.03 | .025 | -0.08 |  | -0.06 | 0.03 | .025 | -0.07 |
| Depression | 0.06 | 0.03 | .048 | 0.06 |  | 0.06 | 0.03 | .048 | 0.06 |
| Perceived social competence | -0.07 | 0.03 | .017 | -0.06 |  | -0.07 | 0.03 | .017 | -0.06 |
| Intensity of meeting friends offline | 0.03 | 0.02 | .090 | 0.05 |  | 0.03 | 0.02 | .090 | 0.04 |
| Impulsivity | 0.04 | 0.03 | .296 | 0.04 |  | 0.04 | 0.03 | .296 | 0.04 |
| Attention deficit | -0.01 | 0.04 | .703 | -0.01 |  | -0.01 | 0.04 | .703 | -0.01 |
| Narcissism | 0.07 | 0.04 | .050 | 0.05 |  | 0.07 | 0.04 | .050 | 0.05 |
| Self-esteem | 0.04 | 0.03 | .136 | 0.05 |  | 0.04 | 0.03 | .128 | 0.05 |
| Problematic social media use | 0.01 | 0.02 | .537 | 0.02 |  | 0.01 | 0.02 | .534 | 0.02 |
| Problematic social media use*Self-esteem | -0.02 | 0.02 | .257 | -0.03 |  | -0.02 | 0.02 | .257 | -0.03 |
