# Supplementary material for: Who are more vulnerable to FoMO? Predictors and moderators of FoMO among Dutch adolescents
Source: Research Square preprint supplement (doi:10.21203/rs.3.rs-7790755/v1), 2025-11-21
Supplement: Supplementary file 2 [file 8ec9af454ee9b55c88d27e16.docx]

**Appendix 3**

**Table C1**

*Independent T-Test Between Complete Group and Attrition Group*

|  | *t-*value | *df* | *p*-value | *Mean/SD*  (Attrition group) | *Mean/SD*  (Complete group) | Cohen’s *d* |
| --- | --- | --- | --- | --- | --- | --- |
| Age T1 | 15.492 | 2607.066 | < .001 | 14.30/1.12 | 13.61/1.18 | 0.61 |
| Educational level T1 | -15.521 | 2589.224 | < .001 | 1.28/0.58 | 1.67/0.70 | -0.60 |
| SMUI T1 | 5.235 | 2607.409 | < .001 | 4.06/1.29 | 3.79/1.35 | 0.20 |
| PSMU T1 | 2.386 | 2613 | .017 | 13.8/1.62 | 1.23/1.54 | 0.09 |
| Life satisfaction T1 | -2.110 | 2532.768 | .035 | 4.57/0.96 | 4.65/0.88 | -0.08 |
| Depression T1 | 1.455 | 2556.291 | .146 | 2.30/0.83 | 2.26/0.78 | 0.06 |
| PSC T1 | -0.002 | 2613 | .998 | 4.23/0.71 | 4.32/0.70 | 0.00 |
| IMF T1 | 3.049 | 2480.046 | .002 | 3.46/1.19 | 3.33/1.04 | 0.12 |
| Impulsivity T1 | 4.819 | 2528.549 | < .001 | 2.03/0.75 | 1.89/0.69 | 0.19 |
| Attention deficit T1 | 2.273 | 2554.836 | .023 | 2.37/0.79 | 2.30/0.75 | 0.09 |
| Narcissism T1 | 2.727 | 2545.252 | .006 | 2.23/0.59 | 2.17/0.55 | 0.11 |
| Self-esteem T1 | 0.222 | 2545.380 | .824 | 3.79/0.78 | 3.79/0.73 | 0.01 |
| FoMO T1 | -1.643 | 2613 | .101 | 1.73/0.74 | 1.78/0.72 | -0.06 |

Note. T = time point, SMUI = social media use intensity, PSMU = problematic social media use, PSC = perceived social competence, IMF = intensity of meeting friends offline, FoMO = fear of missing out.
