# Supplementary material for: Who are more vulnerable to FoMO? Predictors and moderators of FoMO among Dutch adolescents
Source: Research Square preprint supplement (doi:10.21203/rs.3.rs-7790755/v1), 2025-11-21
Supplement: Supplementary file 3 [file b33f29d0d08a8757a907d497.docx]

**Appendix 1**

**Table A1**

*Interaction Effect of Social Media Use Intensity and Life Satisfaction*

| **Predictor** | **Full sample (*n* = 1419)** | | | |  | **Complete sample (*n* = 1369)** | | | |
| --- | --- | --- | --- | --- | --- | --- | --- | --- | --- |
|  | ***b*** | ***SE*** | ***p*** | ***β*** |  | ***b*** | ***SE*** | ***p*** | ***β*** |
| Gender | **0.13** | **0.04** | **.001** | **0.09** |  | **0.13** | **0.04** | **.001** | **0.09** |
| Age | 0.02 | 0.02 | .367 | 0.02 |  | 0.02 | 0.02 | .367 | 0.02 |
| Educational level | **0.06** | **0.02** | **.001** | **0.08** |  | **0.06** | **0.02** | **.001** | **0.08** |
| FoMO T1 | **0.30** | **0.02** | **< .001** | **0.40** |  | **0.30** | **0.02** | **< .001** | **0.39** |
| Life satisfaction | **-0.06** | **0.03** | **.018** | **-0.08** |  | **-0.06** | **0.02** | **.017** | **-0.08** |
| Depression | 0.05 | 0.02 | .050 | 0.06 |  | 0.05 | 0.02 | .050 | 0.06 |
| Perceived social competence | **-0.05** | **0.02** | **.012** | **-0.07** |  | **-0.05** | **0.02** | **.012** | **-0.07** |
| Intensity of meeting friends offline | 0.03 | 0.02 | .239 | 0.03 |  | 0.02 | 0.02 | .239 | 0.03 |
| Impulsivity | 0.03 | 0.03 | .285 | 0.04 |  | 0.03 | 0.03 | .286 | 0.04 |
| Attention deficit | -0.01 | 0.03 | .695 | -0.01 |  | -0.01 | 0.03 | .695 | -0.01 |
| Narcissism | **0.04** | **0.02** | **.048** | **0.05** |  | **0.04** | **0.02** | **.048** | **0.05** |
| Self-esteem | 0.04 | 0.03 | .123 | 0.05 |  | 0.04 | 0.03 | .123 | 0.05 |
| Social media use intensity | 0.02 | 0.02 | .219 | 0.03 |  | 0.03 | 0.02 | .212 | 0.03 |
| Social media use intensity*Life satisfaction | 0.01 | 0.02 | .592 | 0.01 |  | 0.01 | 0.02 | .592 | 0.01 |

Note. Significant coefficient is highlighted in bold, same as below.

**Table A2**

*Interaction Effect of Social Media Use Intensity and Depression*

| **Predictor** | **Full sample (*n* = 1419)** | | | |  | **Complete sample (*n* = 1369)** | | | |
| --- | --- | --- | --- | --- | --- | --- | --- | --- | --- |
|  | ***b*** | ***SE*** | ***p*** | ***β*** |  | ***b*** | ***SE*** | ***p*** | ***β*** |
| Gender | **0.13** | **0.04** | **.001** | **0.09** |  | **0.13** | **0.04** | **0.001** | **0.09** |
| Age | 0.01 | 0.02 | .370 | 0.02 |  | 0.01 | 0.02 | 0.370 | 0.02 |
| Educational level | **0.09** | **0.03** | **.001** | **0.08** |  | **0.09** | **0.03** | **0.001** | **0.08** |
| FoMO T1 | **0.41** | **0.03** | **< .001** | **0.40** |  | **0.41** | **0.03** | **< .001** | **0.39** |
| Life satisfaction | **-0.07** | **0.03** | **.017** | **-0.08** |  | **-0.07** | **0.03** | **0.017** | **-0.08** |
| Depression | **0.05** | **0.02** | **.049** | **0.06** |  | **0.05** | **0.02** | **0.046** | **0.06** |
| Perceived social competence | **-0.07** | **0.03** | **.012** | **-0.07** |  | **-0.07** | **0.03** | **0.012** | **-0.07** |
| Intensity of meeting friends offline | 0.02 | 0.02 | .224 | 0.04 |  | 0.02 | 0.02 | 0.224 | 0.03 |
| Impulsivity | 0.04 | 0.03 | .302 | 0.04 |  | 0.04 | 0.03 | 0.302 | 0.04 |
| Attention deficit | -0.01 | 0.04 | .706 | -0.01 |  | -0.01 | 0.04 | 0.706 | -0.01 |
| Narcissism | **0.07** | **0.04** | **.049** | **0.05** |  | **0.07** | **0.04** | **0.049** | **0.05** |
| Self-esteem | 0.05 | 0.03 | .130 | 0.05 |  | 0.05 | 0.03 | 0.130 | 0.05 |
| Social media use intensity | 0.02 | 0.02 | .227 | 0.03 |  | 0.02 | 0.02 | 0.223 | 0.03 |
| Social media use intensity*Depression | -0.01 | 0.02 | .631 | -0.01 |  | -0.01 | 0.02 | 0.631 | -0.01 |

**Table A3**

*Interaction Effect of Social Media Use Intensity and Perceived Social Competence*

| **Predictor** | **Full sample (*n* = 1419)** | | | |  | **Complete sample (*n* = 1369)** | | | |
| --- | --- | --- | --- | --- | --- | --- | --- | --- | --- |
|  | ***b*** | ***SE*** | ***p*** | ***β*** |  | ***b*** | ***SE*** | ***p*** | ***β*** |
| Gender | **0.13** | **0.04** | **.001** | **0.09** |  | **0.13** | **0.04** | **.001** | **0.09** |
| Age | 0.01 | 0.02 | .376 | 0.02 |  | 0.01 | 0.02 | .376 | 0.02 |
| Educational level | **0.09** | **0.03** | **.001** | **0.08** |  | **0.09** | **0.03** | **.001** | **0.08** |
| FoMO T1 | **0.41** | **0.03** | **< .001** | **0.40** |  | **0.41** | **0.03** | **< .001** | **0.39** |
| Life satisfaction | **-0.07** | **0.03** | **.017** | **-0.08** |  | **-0.07** | **0.03** | **.017** | **-0.08** |
| Depression | 0.06 | 0.03 | .053 | 0.06 |  | 0.06 | 0.03 | .053 | 0.06 |
| Perceived social competence | **-0.05** | **0.02** | **.018** | **-0.07** |  | **-0.05** | **0.02** | **.015** | **-0.07** |
| Intensity of meeting friends offline | 0.02 | 0.02 | .226 | 0.04 |  | 0.02 | 0.02 | .226 | 0.03 |
| Impulsivity | 0.04 | 0.03 | .295 | 0.04 |  | 0.04 | 0.03 | .295 | 0.04 |
| Attention deficit | -0.01 | 0.04 | .698 | -0.01 |  | -0.01 | 0.04 | .698 | -0.01 |
| Narcissism | **0.07** | **0.04** | **.048** | **0.05** |  | **0.07** | **0.04** | **.048** | **0.05** |
| Self-esteem | 0.05 | 0.03 | .133 | 0.05 |  | 0.05 | 0.03 | .133 | 0.05 |
| Social media use intensity | 0.03 | 0.02 | .204 | 0.03 |  | 0.03 | 0.02 | .204 | 0.03 |
| Social media use intensity* Perceived social competence | 0.01 | 0.02 | .662 | 0.01 |  | 0.01 | 0.02 | .662 | 0.01 |

**Table A4**

*Interaction Effect of Social Media Use Intensity and Intensity of Meeting Friends Offline*

| **Predictor** | **Full sample (*n* = 1419)** | | | |  | **Complete sample (*n* = 1369)** | | | |
| --- | --- | --- | --- | --- | --- | --- | --- | --- | --- |
|  | ***b*** | ***SE*** | ***p*** | ***β*** |  | ***b*** | ***SE*** | ***p*** | ***β*** |
| Gender | **0.13** | **0.04** | **.001** | **0.09** |  | **0.13** | **0.04** | **0.001** | **0.09** |
| Age | 0.01 | 0.02 | .368 | 0.02 |  | 0.01 | 0.02 | 0.368 | 0.02 |
| Educational level | **0.09** | **0.03** | **.001** | **0.08** |  | **0.09** | **0.03** | **0.001** | **0.08** |
| FoMO T1 | **0.41** | **0.03** | **< .001** | **0.40** |  | **0.41** | **0.03** | **< .001** | **0.39** |
| Life satisfaction | **-0.07** | **0.03** | **.018** | **-0.08** |  | **-0.07** | **0.03** | **0.018** | **-0.08** |
| Depression | 0.06 | 0.03 | .052 | 0.06 |  | 0.06 | 0.03 | 0.052 | 0.06 |
| Perceived social competence | **-0.07** | **0.03** | **.012** | **-0.07** |  | **-0.07** | **0.03** | **0.012** | **-0.07** |
| Intensity of meeting friends offline | 0.03 | 0.02 | .224 | 0.04 |  | 0.02 | 0.02 | 0.225 | 0.03 |
| Impulsivity | 0.04 | 0.03 | .284 | 0.04 |  | 0.04 | 0.03 | 0.284 | 0.04 |
| Attention deficit | -0.01 | 0.04 | .695 | -0.01 |  | -0.01 | 0.04 | 0.695 | -0.01 |
| Narcissism | **0.07** | **0.04** | **.049** | **0.05** |  | **0.07** | **0.04** | **0.049** | **0.05** |
| Self-esteem | 0.05 | 0.03 | .133 | 0.05 |  | 0.05 | 0.03 | 0.133 | 0.05 |
| Social media use intensity | 0.02 | 0.02 | .218 | 0.03 |  | 0.03 | 0.02 | 0.216 | 0.03 |
| Social media use intensity* Intensity of meeting friends offline | 0.00 | 0.02 | .981 | 0.00 |  | 0.00 | 0.02 | 0.981 | 0.00 |

**Table A5**

*Interaction Effect of Social Media Use Intensity and Impulsivity*

| **Predictor** | **Full sample (*n* = 1419)** | | | |  | **Complete sample (*n* = 1369)** | | | |
| --- | --- | --- | --- | --- | --- | --- | --- | --- | --- |
|  | ***b*** | ***SE*** | ***p*** | ***β*** |  | ***b*** | ***SE*** | ***p*** | ***β*** |
| Gender | **0.13** | **0.04** | **.001** | **0.09** |  | **0.13** | **0.04** | **.001** | **0.09** |
| Age | 0.01 | 0.02 | .375 | 0.02 |  | 0.01 | 0.02 | .375 | 0.02 |
| Educational level | **0.09** | **0.03** | **.001** | **0.08** |  | **0.09** | **0.03** | **.001** | **0.08** |
| FoMO T1 | **0.41** | **0.03** | **< .001** | **0.40** |  | **0.41** | **0.03** | **< .001** | **0.39** |
| Life satisfaction | **-0.07** | **0.03** | **.018** | **-0.08** |  | **-0.07** | **0.03** | **.018** | **-0.08** |
| Depression | 0.06 | 0.03 | .055 | 0.06 |  | 0.06 | 0.03 | .055 | 0.06 |
| Perceived social competence | **-0.07** | **0.03** | **.013** | **-0.07** |  | **-0.07** | **0.03** | **.013** | **-0.07** |
| Intensity of meeting friends offline | 0.02 | 0.02 | .225 | 0.04 |  | 0.02 | 0.02 | .225 | 0.03 |
| Impulsivity | -0.01 | 0.03 | .731 | -0.01 |  | -0.01 | 0.03 | .756 | -0.01 |
| Attention deficit | 0.04 | 0.03 | .290 | 0.04 |  | 0.04 | 0.03 | .290 | 0.04 |
| Narcissism | **0.07** | **0.04** | **.048** | **0.05** |  | **0.07** | **0.04** | **.048** | **0.05** |
| Self-esteem | 0.05 | 0.03 | .137 | 0.05 |  | 0.05 | 0.03 | .137 | 0.05 |
| Social media use intensity | 0.02 | 0.02 | .225 | 0.03 |  | 0.03 | 0.02 | .211 | 0.03 |
| Social media use intensity*Impulsivity | -0.01 | 0.02 | .635 | -0.01 |  | -0.01 | 0.02 | .635 | -0.01 |

**Table A6**

*Interaction Effect of Social Media Use Intensity and Attention Deficit*

| **Predictor** | **Full sample (*n* = 1419)** | | | |  | **Complete sample (*n* = 1369)** | | | |
| --- | --- | --- | --- | --- | --- | --- | --- | --- | --- |
|  | ***b*** | ***SE*** | ***p*** | ***β*** |  | ***b*** | ***SE*** | ***p*** | ***β*** |
| Gender | **0.13** | **0.04** | **.001** | **0.09** |  | **0.13** | **0.04** | **.001** | **0.09** |
| Age | 0.02 | 0.02 | .354 | 0.02 |  | 0.02 | 0.02 | .354 | 0.02 |
| Educational level | **0.09** | **0.03** | **.001** | **0.08** |  | **0.09** | **0.03** | **.001** | **0.08** |
| FoMO T1 | **0.41** | **0.03** | **< .001** | **0.40** |  | **0.41** | **0.03** | **< .001** | **0.39** |
| Life satisfaction | **-0.07** | **0.03** | **.020** | **-0.08** |  | **-0.07** | **0.03** | **.020** | **-0.08** |
| Depression | **0.06** | **0.03** | **.044** | **0.07** |  | **0.06** | **0.03** | **.044** | **0.06** |
| Perceived social competence | **-0.08** | **0.03** | **.009** | **-0.07** |  | **-0.08** | **0.03** | **.009** | **-0.07** |
| Intensity of meeting friends offline | 0.02 | 0.02 | .219 | 0.04 |  | 0.02 | 0.02 | .219 | 0.03 |
| Impulsivity | -0.02 | 0.04 | .627 | -0.02 |  | -0.02 | 0.04 | .627 | -0.02 |
| Attention deficit | 0.03 | 0.03 | .255 | 0.04 |  | 0.03 | 0.03 | .286 | 0.04 |
| Narcissism | 0.07 | 0.04 | .051 | 0.05 |  | 0.07 | 0.04 | .051 | 0.05 |
| Self-esteem | 0.05 | 0.03 | .128 | 0.05 |  | 0.05 | 0.03 | .128 | 0.05 |
| Social media use intensity | 0.02 | 0.02 | .212 | 0.03 |  | 0.02 | 0.02 | .228 | 0.03 |
| Social media use intensity*Attention deficit | 0.02 | 0.02 | .245 | 0.03 |  | 0.02 | 0.02 | .245 | 0.03 |

**Table A7**

*Interaction Effect of Social Media Use Intensity and Narcissism*

| **Predictor** | **Full sample (*n* = 1419)** | | | |  | **Complete sample (*n* = 1369)** | | | |
| --- | --- | --- | --- | --- | --- | --- | --- | --- | --- |
|  | ***b*** | ***SE*** | ***p*** | ***β*** |  | ***b*** | ***SE*** | ***p*** | ***β*** |
| Gender | **0.13** | **0.04** | **.001** | **0.09** |  | **0.13** | **0.04** | **.001** | **0.09** |
| Age | 0.01 | 0.02 | .369 | 0.02 |  | 0.01 | 0.02 | .369 | 0.02 |
| Educational level | **0.09** | **0.03** | **.001** | **0.08** |  | **0.09** | **0.03** | **.001** | **0.08** |
| FoMO T1 | **0.41** | **0.03** | **< .001** | **0.40** |  | **0.41** | **0.03** | **< .001** | **0.39** |
| Life satisfaction | **-0.07** | **0.03** | **.018** | **-0.08** |  | **-0.07** | **0.03** | **.018** | **-0.08** |
| Depression | 0.06 | 0.03 | .052 | 0.06 |  | 0.06 | 0.03 | .052 | 0.06 |
| Perceived social competence | **-0.07** | **0.03** | **.012** | **-0.07** |  | **-0.07** | **0.03** | **.012** | **-0.07** |
| Intensity of meeting friends offline | 0.02 | 0.02 | .223 | 0.04 |  | 0.02 | 0.02 | .223 | 0.03 |
| Impulsivity | -0.01 | 0.04 | .697 | -0.01 |  | -0.01 | 0.04 | .697 | -0.01 |
| Attention deficit | 0.04 | 0.03 | .285 | 0.04 |  | 0.04 | 0.03 | .285 | 0.04 |
| Narcissism | **0.04** | **0.02** | **.049** | **0.05** |  | 0.04 | 0.02 | .050 | 0.05 |
| Self-esteem | 0.05 | 0.03 | .135 | 0.05 |  | 0.05 | 0.03 | .134 | 0.05 |
| Social media use intensity | 0.02 | 0.02 | .214 | 0.03 |  | 0.03 | 0.02 | .214 | 0.03 |
| Social media use intensity*Narcissism | 0.00 | 0.02 | .940 | 0.00 |  | 0.00 | 0.02 | .941 | 0.00 |

**Table A8**

*Interaction Effect of Social Media Use Intensity and Self-Esteem*

| **Predictor** | | **Full sample (*n* = 1419)** | | | |  | | **Complete sample (*n* = 1369)** | | | | |
| --- | --- | --- | --- | --- | --- | --- | --- | --- | --- | --- | --- | --- |
|  | ***b*** | | ***SE*** | ***p*** | ***β*** | |  | | ***b*** | ***SE*** | ***p*** | ***β*** | |
| Gender | **0.13** | | **0.04** | **.001** | **0.09** | |  | | **0.13** | **0.04** | **.001** | **0.09** | |
| Age | 0.02 | | 0.02 | .351 | 0.02 | |  | | 0.02 | 0.02 | .350 | 0.02 | |
| Educational level | **0.09** | | **0.03** | **.001** | **0.08** | |  | | **0.09** | **0.03** | **.001** | **0.08** | |
| FoMO T1 | **0.41** | | **0.03** | **< .001** | **0.40** | |  | | **0.41** | **0.03** | **< .001** | **0.39** | |
| Life satisfaction | **-0.07** | | **0.03** | **.019** | **-0.08** | |  | | **-0.07** | **0.03** | **.019** | **-0.08** | |
| Depression | 0.06 | | 0.03 | .050 | 0.06 | |  | | 0.06 | 0.03 | .050 | 0.06 | |
| Perceived social competence | **-0.07** | | **0.03** | **.013** | **-0.07** | |  | | **-0.07** | **0.03** | **.013** | **-0.07** | |
| Intensity of meeting friends offline | 0.02 | | 0.02 | .244 | 0.03 | |  | | 0.02 | 0.02 | .244 | 0.03 | |
| Impulsivity | -0.01 | | 0.04 | .716 | -0.01 | |  | | -0.01 | 0.04 | .716 | -0.01 | |
| Attention deficit | 0.04 | | 0.03 | .284 | 0.04 | |  | | 0.04 | 0.03 | .284 | 0.04 | |
| Narcissism | **0.07** | | **0.04** | **.048** | **0.05** | |  | | **0.07** | **0.04** | **.048** | **0.05** | |
| Self-esteem | 0.04 | | 0.03 | .112 | 0.05 | |  | | 0.04 | 0.02 | .124 | 0.05 | |
| Social media use intensity | 0.02 | | 0.02 | .223 | 0.03 | |  | | 0.02 | 0.02 | .224 | 0.03 | |
| Social media use intensity*Self-esteem | 0.02 | | 0.02 | .397 | 0.02 | |  | | 0.02 | 0.02 | .396 | 0.02 | |

**Table A9**

*Interaction Effect of Gender and Life Satisfaction*

| **Predictor** | **Full sample (*n* = 1419)** | | | |  | **Complete sample (*n* = 1369)** | | | |
| --- | --- | --- | --- | --- | --- | --- | --- | --- | --- |
|  | ***b*** | ***SE*** | ***p*** | ***β*** |  | ***b*** | ***SE*** | ***p*** | ***β*** |
| Age | 0.02 | 0.02 | .280 | 0.03 |  | 0.02 | 0.02 | .280 | 0.03 |
| Educational level | **0.09** | **0.03** | **.001** | **0.08** |  | **0.09** | **0.03** | **.001** | **0.08** |
| FoMO T1 | **0.41** | **0.03** | **< .001** | **0.40** |  | **0.41** | **0.03** | **< .001** | **0.39** |
| Life satisfaction | -0.04 | 0.03 | .224 | -0.05 |  | -0.04 | 0.03 | .224 | -0.05 |
| Depression | 0.05 | 0.03 | .074 | 0.06 |  | 0.05 | 0.03 | .074 | 0.06 |
| Perceived social competence | **-0.07** | **0.03** | **.015** | **-0.07** |  | **-0.07** | **0.03** | **.015** | **-0.07** |
| Intensity of meeting friends offline | 0.03 | 0.02 | .106 | 0.04 |  | 0.03 | 0.02 | .106 | 0.04 |
| Impulsivity | -0.01 | 0.04 | .792 | -0.01 |  | -0.01 | 0.04 | .792 | -0.01 |
| Attention deficit | 0.04 | 0.03 | .275 | 0.04 |  | 0.04 | 0.03 | .275 | 0.04 |
| Narcissism | **0.08** | **0.04** | **.037** | **0.06** |  | **0.08** | **0.04** | **.037** | **0.06** |
| Self-esteem | 0.05 | 0.03 | .170 | 0.05 |  | 0.05 | 0.03 | .170 | 0.04 |
| Gender | **0.14** | **0.04** | **< .001** | **0.09** |  | **0.14** | **0.04** | **< .001** | **0.09** |
| Gender *Life satisfaction | -0.05 | 0.04 | .146 | -0.05 |  | -0.05 | 0.04 | .146 | -0.05 |

**Table A10**

*Interaction Effect of Gender and Depression*

| **Predictor** | **Full sample (*n* = 1419)** | | | |  | **Complete sample (*n* = 1369)** | | | |
| --- | --- | --- | --- | --- | --- | --- | --- | --- | --- |
|  | ***b*** | ***SE*** | ***p*** | ***β*** |  | ***b*** | ***SE*** | ***p*** | ***β*** |
| Age | 0.02 | 0.02 | .337 | 0.02 |  | 0.02 | 0.02 | .337 | 0.02 |
| Educational level | **0.09** | **0.03** | **.001** | **0.08** |  | **0.09** | **0.03** | **.001** | **0.08** |
| FoMO T1 | **0.41** | **0.03** | **< .001** | **0.40** |  | **0.41** | **0.03** | **< .001** | **0.40** |
| Life satisfaction | **-0.07** | **0.03** | **.018** | **-0.08** |  | **-0.07** | **0.03** | **.018** | **-0.08** |
| Depression | 0.01 | 0.03 | .801 | 0.01 |  | 0.01 | 0.03 | .802 | 0.01 |
| Perceived social competence | **-0.07** | **0.03** | **.012** | **-0.07** |  | **-0.07** | **0.03** | **.012** | **-0.07** |
| Intensity of meeting friends offline | 0.03 | 0.02 | .102 | 0.04 |  | 0.03 | 0.02 | .102 | 0.04 |
| Impulsivity | -0.01 | 0.04 | .866 | -0.01 |  | -0.01 | 0.04 | .866 | -0.01 |
| Attention deficit | 0.04 | 0.03 | .286 | 0.04 |  | 0.04 | 0.03 | .286 | 0.04 |
| Narcissism | **0.07** | **0.04** | **.040** | **0.06** |  | **0.07** | **0.04** | **.040** | **0.05** |
| Self-esteem | 0.05 | 0.03 | .106 | 0.05 |  | 0.05 | 0.03 | .106 | 0.05 |
| Gender | **0.14** | **0.04** | **< .001** | **0.09** |  | **0.14** | **0.04** | **< .001** | **0.09** |
| Gender * Depression | **0.08** | **0.04** | **.038** | **0.07** |  | **0.08** | **0.04** | **.038** | **0.07** |

**Table A11**

*Interaction Effect of Gender and Perceived Social Competence*

| **Predictor** | **Full sample (*n* = 1419)** | | | |  | **Complete sample (*n* = 1369)** | | | |
| --- | --- | --- | --- | --- | --- | --- | --- | --- | --- |
|  | ***b*** | ***SE*** | ***p*** | ***β*** |  | ***b*** | ***SE*** | ***p*** | ***β*** |
| Age | 0.02 | 0.02 | .267 | 0.03 |  | 0.02 | 0.02 | .266 | 0.03 |
| Educational level | **0.09** | **0.03** | **.002** | **0.08** |  | **0.09** | **0.03** | **.002** | **0.08** |
| FoMO T1 | **0.41** | **0.03** | **< .001** | **0.40** |  | **0.41** | **0.03** | **< .001** | **0.39** |
| Life satisfaction | **-0.07** | **0.03** | **.016** | **-0.08** |  | **-0.07** | **0.03** | **.016** | **-0.08** |
| Depression | **0.06** | **0.03** | **.048** | **0.06** |  | **0.06** | **0.03** | **.048** | **0.06** |
| Perceived social competence | -0.04 | 0.03 | .117 | -0.05 |  | -0.04 | 0.03 | .117 | -0.05 |
| Intensity of meeting friends offline | 0.03 | 0.02 | .099 | 0.05 |  | 0.03 | 0.02 | .099 | 0.04 |
| Impulsivity | -0.01 | 0.04 | .781 | -0.01 |  | -0.01 | 0.04 | .781 | -0.01 |
| Attention deficit | 0.04 | 0.03 | .264 | 0.04 |  | 0.04 | 0.03 | .264 | 0.04 |
| Narcissism | **0.08** | **0.04** | **.035** | **0.06** |  | **0.08** | **0.04** | **.035** | **0.06** |
| Self-esteem | 0.05 | 0.03 | .168 | 0.05 |  | 0.05 | 0.03 | .168 | 0.05 |
| Gender | **0.14** | **0.04** | **< .001** | **0.09** |  | **0.14** | **0.04** | **< .001** | **0.09** |
| Gender * Perceived social competence | -0.02 | 0.04 | .587 | -0.02 |  | -0.02 | 0.04 | .587 | -0.02 |

**Table A12**

*Interaction Effect of Gender and Intensity of Meeting Friends Offline*

| **Predictor** | **Full sample (*n* = 1419)** | | | |  | **Complete sample (*n* = 1369)** | | | |
| --- | --- | --- | --- | --- | --- | --- | --- | --- | --- |
|  | ***b*** | ***SE*** | ***p*** | ***β*** |  | ***b*** | ***SE*** | ***p*** | ***β*** |
| Age | 0.02 | 0.02 | .268 | 0.03 |  | 0.02 | 0.02 | .268 | 0.03 |
| Educational level | **0.08** | **0.03** | **.002** | **0.08** |  | **0.08** | **0.03** | **.002** | **0.08** |
| FoMO T1 | **0.41** | **0.03** | **< .001** | **0.40** |  | **0.41** | **0.03** | **< .001** | **0.39** |
| Life satisfaction | **-0.07** | **0.03** | **.015** | **-0.08** |  | **-0.07** | **0.03** | **.015** | **-0.08** |
| Depression | **0.06** | **0.03** | **.048** | **0.06** |  | **0.06** | **0.03** | **.048** | **0.06** |
| Perceived social competence | **-0.07** | **0.03** | **.017** | **-0.06** |  | **-0.07** | **0.03** | **.017** | **-0.06** |
| Intensity of meeting friends offline | 0.05 | 0.03 | .061 | 0.07 |  | 0.05 | 0.02 | .061 | 0.06 |
| Impulsivity | -0.01 | 0.04 | .772 | -0.01 |  | -0.01 | 0.04 | .772 | -0.01 |
| Attention deficit | 0.04 | 0.03 | .267 | 0.04 |  | 0.04 | 0.03 | .267 | 0.04 |
| Narcissism | **0.08** | **0.04** | **.038** | **0.06** |  | **0.08** | **0.04** | **.038** | **0.05** |
| Self-esteem | 0.05 | 0.03 | .167 | 0.05 |  | 0.05 | 0.03 | .167 | 0.05 |
| Gender | **0.14** | **0.04** | **< .001** | **0.09** |  | **0.14** | **0.04** | **< .001** | **0.09** |
| Gender * Intensity of meeting friends offline | -0.04 | 0.04 | .357 | -0.03 |  | -0.03 | 0.04 | .357 | -0.03 |

**Table A13**

*Interaction Effect of Gender and Impulsivity*

| **Predictor** | **Full sample (*n* = 1419)** | | | |  | **Complete sample (*n* = 1369)** | | | |
| --- | --- | --- | --- | --- | --- | --- | --- | --- | --- |
|  | ***b*** | ***SE*** | ***p*** | ***β*** |  | ***b*** | ***SE*** | ***p*** | ***β*** |
| Age | 0.02 | 0.02 | .284 | 0.03 |  | 0.02 | 0.02 | .284 | 0.03 |
| Educational level | **< .001** | **< .001** | **< .001** | **< .001** |  | **< .001** | **< .001** | **< .001** | **< .001** |
| FoMO T1 | **< .001** | **< .001** | **< .001** | **< .001** |  | **< .001** | **< .001** | **< .001** | **< .001** |
| Life satisfaction | **< .001** | **< .001** | **< .001** | **< .001** |  | **< .001** | **< .001** | **< .001** | **< .001** |
| Depression | **< .001** | **< .001** | **< .001** | **< .001** |  | **< .001** | **< .001** | **< .001** | **< .001** |
| Perceived social competence | **< .001** | **< .001** | **< .001** | **< .001** |  | **< .001** | **< .001** | **< .001** | **< .001** |
| Intensity of meeting friends offline | 0.03 | 0.02 | .096 | 0.05 |  | 0.03 | 0.02 | .096 | 0.04 |
| Impulsivity | -0.02 | 0.03 | .504 | -0.03 |  | -0.02 | 0.03 | .504 | -0.03 |
| Attention deficit | 0.04 | 0.03 | .271 | 0.04 |  | 0.04 | 0.03 | .271 | 0.04 |
| Narcissism | **< .001** | **< .001** | **< .001** | **< .001** |  | **< .001** | **< .001** | **< .001** | **< .001** |
| Self-esteem | 0.05 | 0.03 | .146 | 0.05 |  | 0.05 | 0.03 | .146 | 0.05 |
| Gender | **< .001** | **< .001** | **< .001** | **< .001** |  | **< .001** | **< .001** | **< .001** | **< .001** |
| Gender * Impulsivity | 0.03 | 0.04 | .386 | 0.03 |  | 0.03 | 0.04 | .386 | 0.03 |

**Table A14**

*Interaction Effect of Gender and Attention Deficit*

| **Predictor** | **Full sample (*n* = 1419)** | | | |  | **Complete sample (*n* = 1369)** | | | |
| --- | --- | --- | --- | --- | --- | --- | --- | --- | --- |
|  | ***b*** | ***SE*** | ***p*** | ***β*** |  | ***b*** | ***SE*** | ***p*** | ***β*** |
| Age | 0.02 | 0.02 | .279 | 0.03 |  | 0.02 | 0.02 | .279 | 0.03 |
| Educational level | **0.09** | **0.03** | **.002** | **0.08** |  | **0.09** | **0.03** | **.002** | **0.08** |
| FoMO T1 | **0.41** | **0.03** | **< .001** | **0.40** |  | **0.41** | **0.03** | **< .001** | **0.39** |
| Life satisfaction | **-0.07** | **0.03** | **.016** | **-0.08** |  | **-0.07** | **0.03** | **.016** | **-0.08** |
| Depression | 0.06 | 0.03 | .050 | 0.06 |  | 0.06 | 0.03 | .050 | 0.06 |
| Perceived social competence | **-0.07** | **0.03** | **.017** | **-0.06** |  | **-0.07** | **0.03** | **.017** | **-0.06** |
| Intensity of meeting friends offline | 0.03 | 0.02 | .096 | 0.05 |  | 0.03 | 0.02 | .096 | 0.04 |
| Impulsivity | -0.01 | 0.04 | .786 | -0.01 |  | -0.01 | 0.04 | .786 | -0.01 |
| Attention deficit | 0.03 | 0.03 | .413 | 0.03 |  | 0.02 | 0.03 | .413 | 0.03 |
| Narcissism | **0.08** | **0.04** | **.035** | **0.06** |  | **0.08** | **0.04** | **.035** | **0.06** |
| Self-esteem | 0.05 | 0.03 | .159 | 0.05 |  | 0.05 | 0.03 | .159 | 0.05 |
| Gender | **0.14** | **0.04** | **< .001** | **0.09** |  | **0.14** | **0.04** | **< .001** | **0.09** |
| Gender * Attention deficit | 0.01 | 0.04 | .804 | 0.01 |  | 0.01 | 0.04 | .804 | 0.01 |

**Table A15**

*Interaction Effect of Gender and Narcissism*

| **Predictor** | **Full sample (*n* = 1419)** | | | |  | **Complete sample (*n* = 1369)** | | | |
| --- | --- | --- | --- | --- | --- | --- | --- | --- | --- |
|  | ***b*** | ***SE*** | ***p*** | ***β*** |  | ***b*** | ***SE*** | ***p*** | ***β*** |
| Age | 0.02 | 0.02 | .270 | 0.03 |  | 0.02 | 0.02 | .270 | 0.03 |
| Educational level | **0.09** | **0.03** | **.001** | **0.08** |  | **0.09** | **0.03** | **.001** | **0.08** |
| FoMO T1 | **0.41** | **0.03** | **< .001** | **0.40** |  | **0.41** | **0.03** | **< .001** | **0.39** |
| Life satisfaction | **-0.07** | **0.03** | **.018** | **-0.08** |  | **-0.07** | **0.03** | **.018** | **-0.08** |
| Depression | **0.06** | **0.03** | **.047** | **0.06** |  | **0.06** | **0.03** | **.047** | **0.06** |
| Perceived social competence | **-0.07** | **0.03** | **.017** | **-0.06** |  | **-0.07** | **0.03** | **.017** | **-0.06** |
| Intensity of meeting friends offline | 0.03 | 0.02 | .090 | 0.05 |  | 0.03 | 0.02 | .090 | 0.04 |
| Impulsivity | -0.01 | 0.04 | .781 | -0.01 |  | -0.01 | 0.04 | .781 | -0.01 |
| Attention deficit | 0.04 | 0.03 | .254 | 0.04 |  | 0.04 | 0.03 | .254 | 0.04 |
| Narcissism | 0.03 | 0.03 | .247 | 0.04 |  | 0.03 | 0.03 | .247 | 0.04 |
| Self-esteem | 0.05 | 0.03 | .167 | 0.05 |  | 0.05 | 0.03 | .167 | 0.05 |
| Gender | **0.14** | **0.04** | **< .001** | **0.09** |  | **0.14** | **0.04** | **< .001** | **0.09** |
| Gender * Narcissism | 0.03 | 0.04 | .461 | 0.02 |  | 0.03 | 0.04 | .461 | 0.02 |

**Table A16**

*Interaction Effect of Gender and Self-Esteem*

| **Predictor** | **Full sample (*n* = 1419)** | | | |  | **Complete sample (*n* = 1369)** | | | |
| --- | --- | --- | --- | --- | --- | --- | --- | --- | --- |
|  | ***b*** | ***SE*** | ***p*** | ***β*** |  | ***b*** | ***SE*** | ***p*** | ***β*** |
| Age | 0.02 | 0.02 | .292 | 0.03 |  | 0.02 | 0.02 | .292 | 0.03 |
| Educational level | **0.09** | **0.03** | **.001** | **0.08** |  | **0.09** | **0.03** | **.001** | **0.08** |
| FoMO T1 | **0.41** | **0.03** | **< .001** | **0.40** |  | **0.41** | **0.03** | **< .001** | **0.39** |
| Life satisfaction | **-0.07** | **0.03** | **.013** | **-0.08** |  | **-0.07** | **0.03** | **.013** | **-0.08** |
| Depression | 0.06 | 0.03 | .068 | 0.06 |  | 0.06 | 0.03 | .068 | 0.06 |
| Perceived social competence | **-0.07** | **0.03** | **.014** | **-0.07** |  | **-0.07** | **0.03** | **.014** | **-0.07** |
| Intensity of meeting friends offline | 0.03 | 0.02 | .101 | 0.05 |  | 0.03 | 0.02 | .101 | 0.04 |
| Impulsivity | -0.01 | 0.04 | .789 | -0.01 |  | -0.01 | 0.04 | .789 | -0.01 |
| Attention deficit | 0.04 | 0.03 | .285 | 0.04 |  | 0.04 | 0.03 | .285 | 0.04 |
| Narcissism | **0.08** | **0.04** | **.033** | **0.06** |  | **0.08** | **0.04** | **.033** | **0.06** |
| Self-esteem | 0.05 | 0.03 | .076 | 0.07 |  | 0.05 | 0.03 | .076 | 0.07 |
| Gender | **0.14** | **0.04** | **< .001** | **0.09** |  | **0.14** | **0.04** | **< .001** | **0.09** |
| Gender * Self-esteem | -0.04 | 0.04 | .269 | -0.04 |  | -0.04 | 0.04 | .269 | -0.04 |

**Table A17**

*Three-Way Interaction Effect of Social Media Use Intensity, Gender, and Life Satisfaction*

| **Predictor** | **Full sample (*n* = 1419)** | | | |  | **Complete sample (*n* = 1369)** | | | |
| --- | --- | --- | --- | --- | --- | --- | --- | --- | --- |
|  | ***b*** | ***SE*** | ***p*** | ***β*** |  | ***b*** | ***SE*** | ***p*** | ***β*** |
| Age | 0.01 | 0.02 | .377 | 0.02 |  | 0.01 | 0.02 | .377 | 0.02 |
| Educational level | **0.09** | **0.03** | **.001** | **0.08** |  | **0.09** | **0.03** | **.001** | **0.09** |
| FoMO T1 | **0.41** | **0.03** | **< .001** | **0.40** |  | **0.41** | **0.03** | **< .001** | **0.40** |
| Life satisfaction | -0.03 | 0.03 | .304 | -0.04 |  | -0.03 | 0.03 | .261 | -0.04 |
| Depression | 0.05 | 0.03 | .105 | 0.05 |  | 0.05 | 0.03 | .105 | 0.05 |
| Perceived social competence | **-0.08** | **0.03** | **.007** | **-0.07** |  | **-0.08** | **0.03** | **.007** | **-0.07** |
| Intensity of meeting friends offline | 0.02 | 0.02 | .233 | 0.03 |  | 0.02 | 0.02 | .233 | 0.03 |
| Impulsivity | -0.01 | 0.04 | .734 | -0.01 |  | -0.01 | 0.04 | .734 | -0.01 |
| Attention deficit | 0.03 | 0.03 | .314 | 0.03 |  | 0.03 | 0.03 | .314 | 0.03 |
| Narcissism | **0.07** | **0.04** | **.050** | **0.05** |  | **0.07** | **0.04** | **.050** | **0.05** |
| Self-esteem | 0.05 | 0.03 | .118 | 0.05 |  | 0.05 | 0.03 | .118 | 0.05 |
| Social media use intensity | 0.01 | 0.03 | .813 | 0.01 |  | 0.01 | 0.03 | .779 | 0.01 |
| Gender | **0.14** | **0.04** | **.001** | **0.09** |  | **0.13** | **0.04** | **.001** | **0.09** |
| Social media use intensity * Life satisfaction | 0.03 | 0.02 | .191 | 0.04 |  | 0.03 | 0.02 | .192 | 0.04 |
| Gender * Life satisfaction | -0.05 | 0.04 | .164 | -0.05 |  | -0.05 | 0.04 | .201 | -0.04 |
| Gender * Social media use intensity | 0.04 | 0.04 | .230 | 0.04 |  | 0.04 | 0.04 | .247 | 0.04 |
| Gender * Social media use intensity * Life satisfaction | -0.04 | 0.04 | .255 | -0.04 |  | -0.04 | 0.03 | .256 | -0.03 |

**Table A18**

*Three-Way Interaction Effect of Social Media Use Intensity, Gender, and Depression*

| **Predictor** | **Full sample (*n* = 1419)** | | | |  | **Complete sample (*n* = 1369)** | | | |
| --- | --- | --- | --- | --- | --- | --- | --- | --- | --- |
|  | ***b*** | ***SE*** | ***p*** | ***β*** |  | ***b*** | ***SE*** | ***p*** | ***β*** |
| Age | 0.01 | 0.02 | .441 | 0.02 |  | 0.01 | 0.02 | .441 | 0.02 |
| Educational level | **0.09** | **0.03** | **.001** | **0.08** |  | **0.09** | **0.03** | **.001** | **0.09** |
| FoMO T1 | **0.41** | **0.03** | **< .001** | **0.40** |  | **0.41** | **0.03** | **< .001** | **0.40** |
| Life satisfaction | **-0.07** | **0.03** | **.020** | **-0.08** |  | **-0.07** | **0.03** | **.020** | **-0.08** |
| Depression | 0.01 | 0.03 | .815 | 0.01 |  | 0.01 | 0.03 | .769 | 0.01 |
| Perceived social competence | **-0.08** | **0.03** | **.008** | **-0.07** |  | **-0.08** | **0.03** | **.008** | **-0.07** |
| Intensity of meeting friends offline | 0.03 | 0.02 | .190 | 0.04 |  | 0.03 | 0.02 | .190 | 0.04 |
| Impulsivity | -0.01 | 0.04 | .841 | -0.01 |  | -0.01 | 0.04 | .841 | -0.01 |
| Attention deficit | 0.03 | 0.03 | .350 | 0.03 |  | 0.03 | 0.03 | .350 | 0.03 |
| Narcissism | 0.07 | 0.04 | .052 | 0.05 |  | 0.07 | 0.04 | .053 | 0.05 |
| Self-esteem | 0.06 | 0.03 | .088 | 0.06 |  | 0.06 | 0.03 | .088 | 0.06 |
| Social media use intensity | 0.00 | 0.03 | .923 | 0.00 |  | 0.00 | 0.03 | .906 | 0.00 |
| Gender | **0.14** | **0.04** | **< .001** | **0.09** |  | **0.14** | **0.04** | **.001** | **0.09** |
| Social media use intensity * Depression | -0.02 | 0.02 | .386 | -0.03 |  | -0.02 | 0.02 | .386 | -0.03 |
| Gender * Depression | 0.07 | 0.04 | .059 | 0.07 |  | 0.07 | 0.04 | .064 | 0.07 |
| Gender * Social media use intensity | 0.04 | 0.04 | .267 | 0.03 |  | 0.04 | 0.04 | .270 | 0.03 |
| Gender * Social media use intensity * Depression | 0.01 | 0.04 | .778 | 0.01 |  | 0.01 | 0.04 | .778 | 0.01 |

**Table A19**

*Three-Way Interaction Effect of Social Media Use Intensity, Gender, and Perceived Social Competence*

| **Predictor** | **Full sample (*n* = 1419)** | | | |  | **Complete sample (*n* = 1369)** | | | |
| --- | --- | --- | --- | --- | --- | --- | --- | --- | --- |
|  | ***b*** | ***SE*** | ***p*** | ***β*** |  | ***b*** | ***SE*** | ***p*** | ***β*** |
| Age | 0.02 | 0.02 | .361 | 0.02 |  | 0.02 | 0.02 | .360 | 0.02 |
| Educational level | **0.09** | **0.03** | **.001** | **0.08** |  | **0.09** | **0.03** | **.001** | **0.09** |
| FoMO T1 | **0.41** | **0.03** | **< .001** | **0.40** |  | **0.41** | **0.03** | **< .001** | **0.39** |
| Life satisfaction | **-0.07** | **0.03** | **.018** | **-0.08** |  | **-0.07** | **0.03** | **.018** | **-0.08** |
| Depression | 0.05 | 0.03 | .076 | 0.06 |  | 0.05 | 0.03 | .076 | 0.06 |
| Perceived social competence | -0.04 | 0.03 | .175 | -0.05 |  | -0.04 | 0.03 | .144 | -0.05 |
| Intensity of meeting friends offline | 0.02 | 0.02 | .207 | 0.04 |  | 0.02 | 0.02 | .207 | 0.03 |
| Impulsivity | -0.01 | 0.04 | .728 | -0.01 |  | -0.01 | 0.04 | .728 | -0.01 |
| Attention deficit | 0.03 | 0.03 | .324 | 0.03 |  | 0.03 | 0.03 | .324 | 0.03 |
| Narcissism | **0.07** | **0.04** | **.044** | **0.06** |  | **0.07** | **0.04** | **.044** | **0.05** |
| Self-esteem | 0.05 | 0.03 | .148 | 0.05 |  | 0.05 | 0.03 | .148 | 0.05 |
| Social media use intensity | 0.01 | 0.03 | .639 | 0.02 |  | 0.01 | 0.03 | .639 | 0.02 |
| Gender | **0.14** | **0.04** | **< .001** | **0.09** |  | **0.14** | **0.04** | **.001** | **0.09** |
| Social media use intensity * Perceived social competence | 0.02 | 0.02 | .280 | 0.03 |  | 0.02 | 0.02 | .280 | 0.03 |
| Gender * Perceived social competence | -0.04 | 0.04 | .306 | -0.03 |  | -0.03 | 0.04 | .377 | -0.03 |
| Gender * Social media use intensity | 0.05 | 0.04 | .195 | 0.04 |  | 0.05 | 0.04 | .195 | 0.04 |
| Gender * Social media use intensity * Perceived social competence | -0.06 | 0.04 | .101 | -0.04 |  | -0.06 | 0.04 | .101 | -0.05 |

**Table A20**

*Three-Way Interaction Effect of Social Media Use Intensity, Gender, and Intensity of Meeting Friends Offline*

| **Predictor** | **Full sample (*n* = 1419)** | | | |  | **Complete sample (*n* = 1369)** | | | |
| --- | --- | --- | --- | --- | --- | --- | --- | --- | --- |
|  | ***b*** | ***SE*** | ***p*** | ***β*** |  | ***b*** | ***SE*** | ***p*** | ***β*** |
| Age | 0.01 | 0.02 | .407 | 0.02 |  | 0.01 | 0.02 | .407 | 0.02 |
| Educational level | **0.09** | **0.03** | **.001** | **0.08** |  | **0.09** | **0.03** | **.001** | **0.08** |
| FoMO T1 | **0.41** | **0.03** | **< .001** | **0.40** |  | **0.41** | **0.03** | **< .001** | **0.39** |
| Life satisfaction | **-0.06** | **0.03** | **.021** | **-0.08** |  | **-0.06** | **0.03** | **.021** | **-0.07** |
| Depression | 0.05 | 0.03 | .089 | 0.06 |  | 0.05 | 0.03 | .089 | 0.05 |
| Perceived social competence | **-0.08** | **0.03** | **.008** | **-0.07** |  | **-0.08** | **0.03** | **.008** | **-0.07** |
| Intensity of meeting friends offline | 0.05 | 0.03 | .065 | 0.07 |  | 0.05 | 0.03 | .074 | 0.06 |
| Impulsivity | -0.01 | 0.04 | .700 | -0.01 |  | -0.01 | 0.04 | .700 | -0.01 |
| Attention deficit | 0.04 | 0.03 | .281 | 0.04 |  | 0.04 | 0.03 | .281 | 0.04 |
| Narcissism | 0.07 | 0.04 | .054 | 0.05 |  | 0.07 | 0.04 | .054 | 0.05 |
| Self-esteem | 0.05 | 0.03 | .155 | 0.05 |  | 0.05 | 0.03 | .155 | 0.05 |
| Social media use intensity | 0.00 | 0.03 | .981 | 0.00 |  | 0.00 | 0.03 | .990 | 0.00 |
| Gender | **0.15** | **0.04** | **< .001** | **0.10** |  | **0.15** | **0.04** | **< .001** | **0.10** |
| Social media use intensity * Intensity of meeting friends offline | 0.02 | 0.02 | .440 | 0.02 |  | 0.02 | 0.02 | .440 | 0.02 |
| Gender * Intensity of meeting friends offline | -0.05 | 0.04 | .229 | -0.04 |  | -0.04 | 0.04 | .289 | -0.03 |
| Gender * Social media use intensity | 0.06 | 0.04 | .120 | 0.05 |  | 0.06 | 0.04 | .101 | 0.05 |
| Gender * Social media use intensity * Intensity of meeting friends offline | -0.06 | 0.04 | .128 | -0.05 |  | -0.05 | 0.04 | .128 | -0.05 |

**Table A21**

*Three-Way Interaction Effect of Social Media Use Intensity, Gender, and Impulsivity*

| **Predictor** | **Full sample (*n* = 1419)** | | | |  | **Complete sample (*n* = 1369)** | | | |
| --- | --- | --- | --- | --- | --- | --- | --- | --- | --- |
|  | ***b*** | ***SE*** | ***p*** | ***β*** |  | ***b*** | ***SE*** | ***p*** | ***β*** |
| Age | 0.01 | 0.02 | .393 | 0.02 |  | 0.01 | 0.02 | .393 | 0.02 |
| Educational level | **0.09** | **0.03** | **.001** | **0.08** |  | **0.09** | **0.03** | **.001** | **0.08** |
| FoMO T1 | **0.41** | **0.03** | **< .001** | **0.40** |  | **0.41** | **0.03** | **< .001** | **0.39** |
| Life satisfaction | **-0.06** | **0.03** | **.022** | **-0.08** |  | **-0.06** | **0.03** | **.022** | **-0.07** |
| Depression | 0.06 | 0.03 | .073 | 0.06 |  | 0.06 | 0.03 | .073 | 0.06 |
| Perceived social competence | **-0.08** | **0.03** | **.010** | **-0.07** |  | **-0.08** | **0.03** | **.010** | **-0.07** |
| Intensity of meeting friends offline | 0.03 | 0.02 | .197 | 0.04 |  | 0.03 | 0.02 | .197 | 0.03 |
| Impulsivity | -0.02 | 0.03 | .545 | -0.02 |  | -0.02 | 0.03 | .572 | -0.02 |
| Attention deficit | 0.04 | 0.03 | .288 | 0.04 |  | 0.04 | 0.03 | .288 | 0.04 |
| Narcissism | **0.07** | **0.04** | **.047** | **0.05** |  | **0.07** | **0.04** | **.047** | **0.05** |
| Self-esteem | 0.05 | 0.03 | .131 | 0.05 |  | 0.05 | 0.03 | .131 | 0.05 |
| Social media use intensity | 0.01 | 0.03 | .711 | 0.01 |  | 0.01 | 0.03 | .682 | 0.01 |
| Gender | **0.13** | **0.04** | **.001** | **0.09** |  | **0.13** | **0.04** | **.002** | **0.08** |
| Social media use intensity * Impulsivity | -0.01 | 0.02 | .565 | -0.02 |  | -0.01 | 0.02 | .565 | -0.02 |
| Gender * Impulsivity | 0.02 | 0.04 | .615 | 0.02 |  | 0.02 | 0.04 | .659 | 0.01 |
| Gender * Social media use intensity | 0.04 | 0.04 | .279 | 0.04 |  | 0.04 | 0.04 | .296 | 0.03 |
| Gender * Social media use intensity * Impulsivity | 0.02 | 0.04 | .568 | 0.02 |  | 0.02 | 0.04 | .568 | 0.02 |

**Table A22**

*Three-Way Interaction Effect of Social Media Use Intensity, Gender, and Attention Deficit*

| **Predictor** | **Full sample (*n* = 1419)** | | | |  | **Complete sample (*n* = 1369)** | | | |
| --- | --- | --- | --- | --- | --- | --- | --- | --- | --- |
|  | ***b*** | ***SE*** | ***p*** | ***β*** |  | ***b*** | ***SE*** | ***p*** | ***β*** |
| Age | 0.02 | 0.02 | .353 | 0.02 |  | 0.02 | 0.02 | .353 | 0.02 |
| Educational level | **0.09** | **0.03** | **.001** | **0.08** |  | **0.09** | **0.03** | **.001** | **0.08** |
| FoMO T1 | **0.41** | **0.03** | **< .001** | **0.40** |  | **0.41** | **0.03** | **< .001** | **0.39** |
| Life satisfaction | **-0.06** | **0.03** | **.021** | **-0.08** |  | **-0.06** | **0.03** | **.021** | **-0.07** |
| Depression | 0.06 | 0.03 | .057 | 0.06 |  | 0.06 | 0.03 | .057 | 0.06 |
| Perceived social competence | **-0.08** | **0.03** | **.007** | **-0.07** |  | **-0.08** | **0.03** | **.007** | **-0.07** |
| Intensity of meeting friends offline | 0.03 | 0.02 | .174 | 0.04 |  | 0.03 | 0.02 | .174 | 0.04 |
| Impulsivity | -0.02 | 0.04 | .614 | -0.02 |  | -0.02 | 0.04 | .614 | -0.02 |
| Attention deficit | 0.04 | 0.03 | .255 | 0.05 |  | 0.03 | 0.03 | .305 | 0.04 |
| Narcissism | **0.07** | **0.04** | **.047** | **0.05** |  | **0.07** | **0.04** | **.047** | **0.05** |
| Self-esteem | 0.05 | 0.03 | .143 | 0.05 |  | 0.05 | 0.03 | .143 | 0.05 |
| Social media use intensity | 0.00 | 0.03 | .989 | 0.00 |  | 0.00 | 0.03 | .960 | 0.00 |
| Gender | **0.14** | **0.04** | **< .001** | **0.09** |  | **0.14** | **0.04** | **.001** | **0.09** |
| Social media use intensity * Attention deficit | 0.04 | 0.02 | .079 | 0.05 |  | 0.04 | 0.02 | .079 | 0.05 |
| Gender * Attention deficit | -0.01 | 0.04 | .845 | -0.01 |  | 0.00 | 0.04 | .925 | 0.00 |
| Gender * Social media use intensity | 0.05 | 0.04 | .178 | 0.04 |  | 0.05 | 0.04 | .163 | 0.04 |
| Gender * Social media use intensity * Attention deficit | -0.04 | 0.04 | .267 | -0.04 |  | -0.04 | 0.04 | .267 | -0.03 |

**Table A23**

*Three-Way Interaction Effect of Social Media Use Intensity, Gender, and Narcissism*

| **Predictor** | **Full sample (*n* = 1419)** | | | |  | **Complete sample (*n* = 1369)** | | | |
| --- | --- | --- | --- | --- | --- | --- | --- | --- | --- |
|  | ***b*** | ***SE*** | ***p*** | ***β*** |  | ***b*** | ***SE*** | ***p*** | ***β*** |
| Age | 0.01 | 0.02 | .375 | 0.02 |  | 0.01 | 0.02 | .375 | 0.02 |
| Educational level | **0.09** | **0.03** | **.001** | **0.08** |  | **0.09** | **0.03** | **.001** | **0.08** |
| FoMO T1 | **0.41** | **0.03** | **< .001** | **0.40** |  | **0.41** | **0.03** | **< .001** | **0.39** |
| Life satisfaction | **-0.06** | **0.03** | **.022** | **-0.08** |  | **-0.06** | **0.03** | **.022** | **-0.07** |
| Depression | 0.06 | 0.03 | .072 | 0.06 |  | 0.06 | 0.03 | .072 | 0.06 |
| Perceived social competence | **-0.08** | **0.03** | **.010** | **-0.07** |  | **-0.08** | **0.03** | **.010** | **-0.07** |
| Intensity of meeting friends offline | 0.03 | 0.02 | .190 | 0.04 |  | 0.03 | 0.02 | .190 | 0.04 |
| Impulsivity | -0.01 | 0.04 | .712 | -0.01 |  | -0.01 | 0.04 | .712 | -0.01 |
| Attention deficit | 0.04 | 0.03 | .276 | 0.04 |  | 0.04 | 0.03 | .276 | 0.04 |
| Narcissism | 0.03 | 0.03 | .249 | 0.04 |  | 0.03 | 0.03 | .252 | 0.04 |
| Self-esteem | 0.05 | 0.03 | .138 | 0.05 |  | 0.05 | 0.03 | .138 | 0.05 |
| Social media use intensity | 0.01 | 0.03 | .796 | 0.01 |  | 0.01 | 0.03 | .802 | 0.01 |
| Gender | **0.14** | **0.04** | **.001** | **0.09** |  | **0.13** | **0.04** | **.001** | **0.09** |
| Social media use intensity * Narcissism | 0.00 | 0.02 | .916 | 0.00 |  | 0.00 | 0.02 | .915 | 0.00 |
| Gender * Narcissism | 0.02 | 0.04 | .560 | 0.02 |  | 0.02 | 0.04 | .567 | 0.02 |
| Gender * Social media use intensity | 0.04 | 0.04 | .240 | 0.04 |  | 0.04 | 0.04 | .240 | 0.04 |
| Gender * Social media use intensity * Narcissism | 0.00 | 0.04 | .958 | 0.00 |  | 0.00 | 0.04 | .958 | 0.00 |

**Table A24**

*Three-Way Interaction Effect of Social Media Use Intensity, Gender, and Self-Esteem*

| **Predictor** | **Full sample (*n* = 1419)** | | | |  | **Complete sample (*n* = 1369)** | | | |
| --- | --- | --- | --- | --- | --- | --- | --- | --- | --- |
|  | ***b*** | ***SE*** | ***p*** | ***β*** |  | ***b*** | ***SE*** | ***p*** | ***β*** |
| Age | 0.01 | 0.02 | .395 | 0.02 |  | 0.01 | 0.02 | .395 | 0.02 |
| Educational level | **0.09** | **0.03** | **.001** | **0.08** |  | **0.09** | **0.03** | **.001** | **0.09** |
| FoMO T1 | **0.41** | **0.03** | **< .001** | **0.40** |  | **0.41** | **0.03** | **< .001** | **0.39** |
| Life satisfaction | **-0.06** | **0.03** | **.021** | **-0.08** |  | **-0.06** | **0.03** | **.021** | **-0.08** |
| Depression | 0.05 | 0.03 | .104 | 0.05 |  | 0.05 | 0.03 | .104 | 0.05 |
| Perceived social competence | **-0.08** | **0.03** | **.006** | **-0.07** |  | **-0.08** | **0.03** | **.006** | **-0.07** |
| Intensity of meeting friends offline | 0.02 | 0.02 | .252 | 0.03 |  | 0.02 | 0.02 | .252 | 0.03 |
| Impulsivity | -0.01 | 0.04 | .778 | -0.01 |  | -0.01 | 0.04 | .778 | -0.01 |
| Attention deficit | 0.03 | 0.03 | .332 | 0.03 |  | 0.03 | 0.03 | .332 | 0.03 |
| Narcissism | **0.07** | **0.04** | **.044** | **0.06** |  | **0.07** | **0.04** | **.044** | **0.05** |
| Self-esteem | **0.07** | **0.03** | **.031** | **0.09** |  | **0.06** | **0.03** | **.038** | **0.08** |
| Social media use intensity | 0.00 | 0.03 | .873 | 0.01 |  | 0.00 | 0.03 | .878 | 0.01 |
| Gender | **0.14** | **0.04** | **.001** | **0.09** |  | **0.13** | **0.04** | **.001** | **0.09** |
| Social media use intensity * Self-esteem | 0.04 | 0.02 | .085 | 0.05 |  | 0.04 | 0.02 | .085 | 0.05 |
| Gender * Self-esteem | -0.05 | 0.04 | .181 | -0.04 |  | -0.05 | 0.04 | .222 | -0.04 |
| Gender * Social media use intensity | 0.05 | 0.04 | .205 | 0.04 |  | 0.05 | 0.04 | .203 | 0.04 |
| Gender * Social media use intensity * Self-esteem | -0.05 | 0.04 | .195 | -0.04 |  | -0.05 | 0.04 | .195 | -0.04 |
